# Supplementary material for: Secondary aerosol formation from mixtures of marine volatile organic compounds in a potential aerosol mass oxidative flow reactor
Source: Royal Society of Chemistry journal article supplement (doi:10.1039/d3ea00169e), 2024-01-01
Supplement: d3ea00169e1.pdf [file d3ea00169e1.pdf]

Supplementary information

Secondary Aerosol Formation from Mixtures of Marine Volatile Organic Compounds in a Potential Aerosol Mass Oxidative Flow Reactor

Alexia N. Moore<sup>1,\*</sup>, Lucia Cancelada<sup>1,\*</sup>, Ke’La A. Kimble<sup>1</sup>, Kimberly A. Prather<sup>1,2</sup>

<sup>1</sup>Department of Chemistry and Biochemistry, University of California, San Diego, La Jolla, CA 92093, U.S.A.

<sup>2</sup>Scripps Institution of Oceanography, University of California, San Diego, La Jolla, CA 92037, U.S.A.

\*Authors contributed equally.

Figure S1: Calibration curve for PAM-OFR lamps

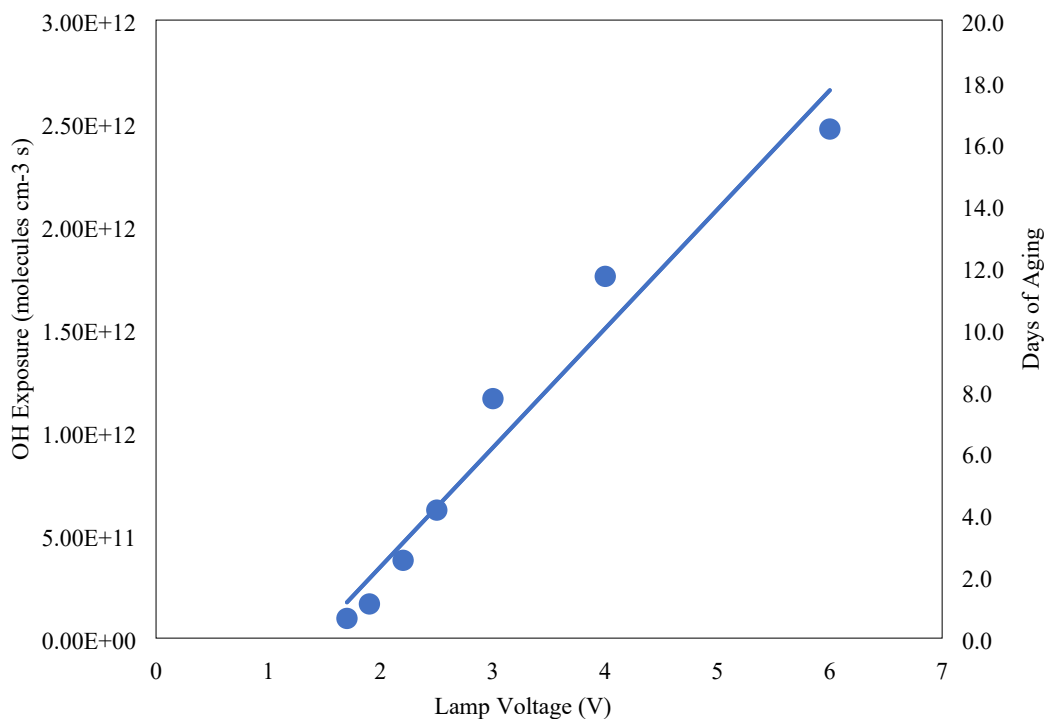

|            |                  |             |               |
|------------|------------------|-------------|---------------|
| [CO] (ppm) | Lamp voltage (V) | OH exposure | Days of aging |
|------------|------------------|-------------|---------------|

|        |     |                                |      |
|--------|-----|--------------------------------|------|
|        |     | (molecules cm <sup>-3</sup> s) |      |
| 0.9967 | 0   | 0                              | 0    |
| 0.9825 | 1.7 | 9.57E+10                       | 0.7  |
| 0.9722 | 1.9 | 1.66E+11                       | 1.3  |
| 0.9418 | 2.2 | 3.78E+11                       | 2.9  |
| 0.9080 | 2.5 | 6.21E+11                       | 4.8  |
| 0.8372 | 3.0 | 1.16E+12                       | 9.0  |
| 0.7659 | 4.0 | 1.76E+12                       | 13.5 |
| 0.6880 | 6.0 | 2.47E+12                       | 19.1 |

17

18 Table S1: Experimental conditions for aerosol filter experiments

19

| Experiment            | VOC source                                                | VOC concentration (ppb)               | OH exposure (molecules s cm <sup>-3</sup> ) |
|-----------------------|-----------------------------------------------------------|---------------------------------------|---------------------------------------------|
| DMS                   | G-cal                                                     | 16                                    | 3.8×10 <sup>11</sup>                        |
| DMDS                  | Permeation tube                                           | 9                                     |                                             |
| Isoprene              | G-cal                                                     | 15                                    |                                             |
| DMS + isoprene        | G-cal                                                     | 15 (DMS)<br>11 (isoprene)             |                                             |
| DMDS + isoprene       | Permeation tube (DMDS)<br>G-cal (isoprene)                | 6 (DMDS)<br>15 (isoprene)             |                                             |
| DMS + DMDS            | G-cal (DMS)<br>Permeation tube (DMDS)                     | 18 (DMS)<br>9 (DMDS)                  |                                             |
| DMS + DMDS + isoprene | G-cal (DMS)<br>Permeation tube (DMDS)<br>G-cal (isoprene) | 15 (DMS)<br>9 (DMDS)<br>12 (isoprene) |                                             |

20 Figure S2: Particle number and volume distribution parameters for low, medium and high OH  
21 exposure (VOCs and mixtures).

22

A. Median number-weighted diameter

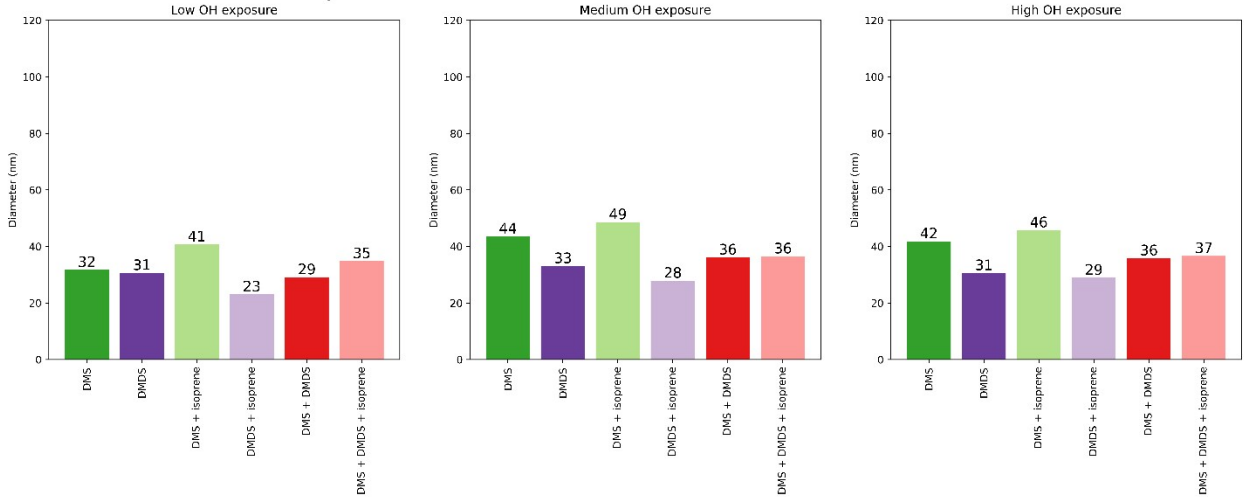

23

B. Median volume-weighted diameter

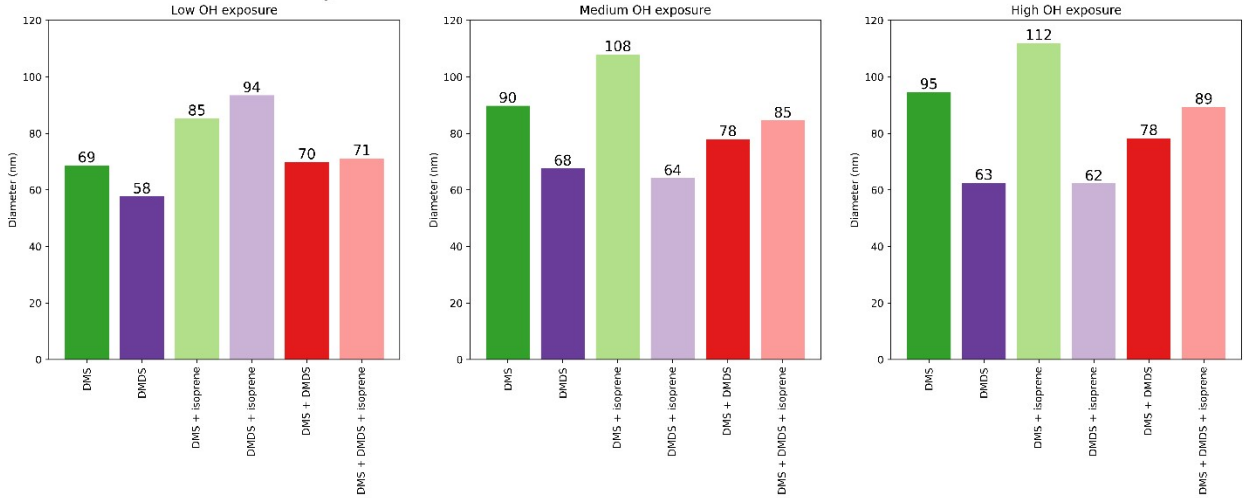

24

### C. Total number concentration

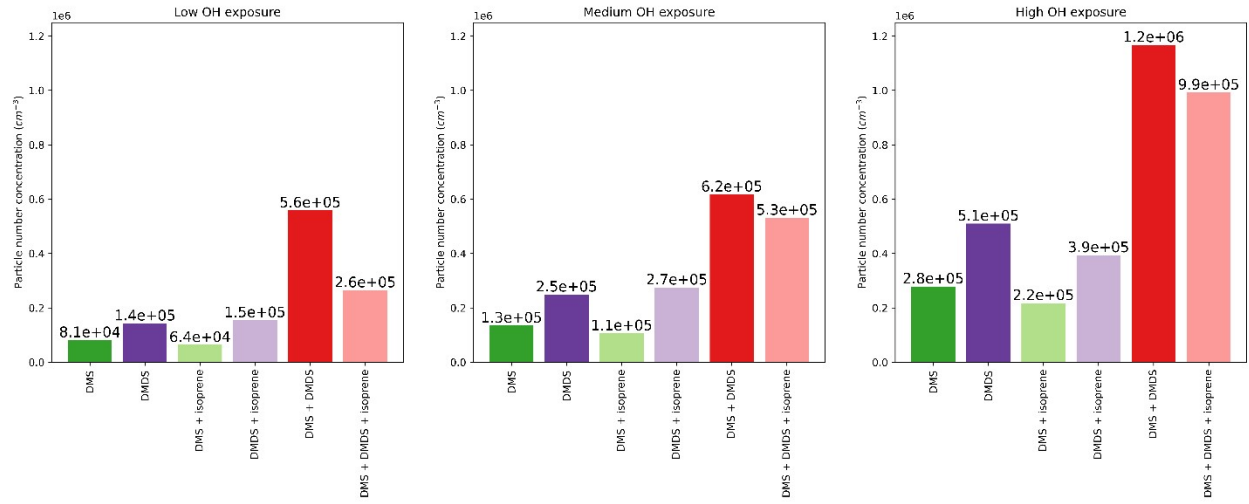

### D. Total volume concentration

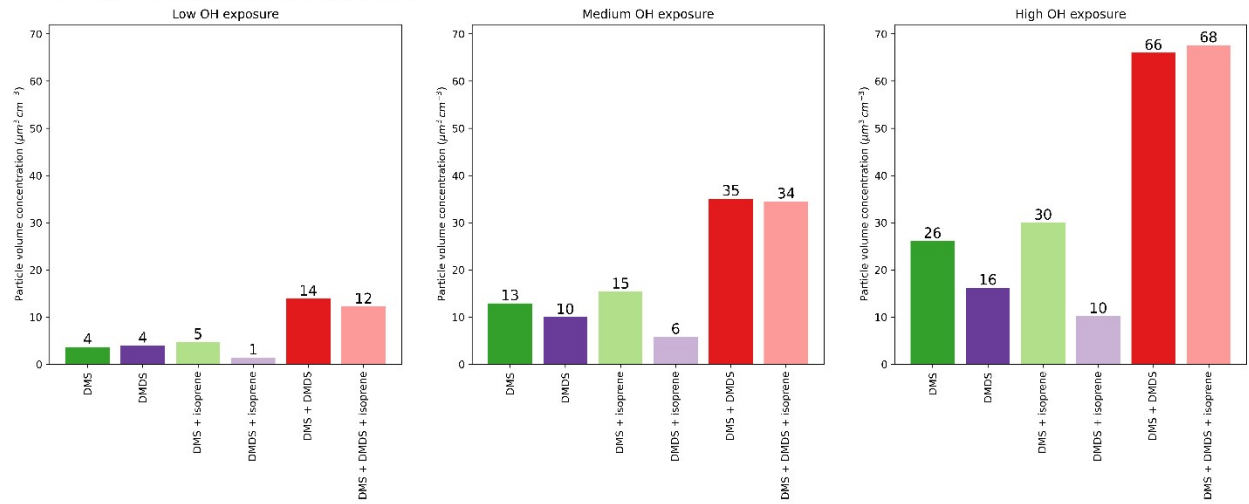

35 Figure S3: Percent non-reacted gas for DMS, DMDS and isoprene yield experiments.

36

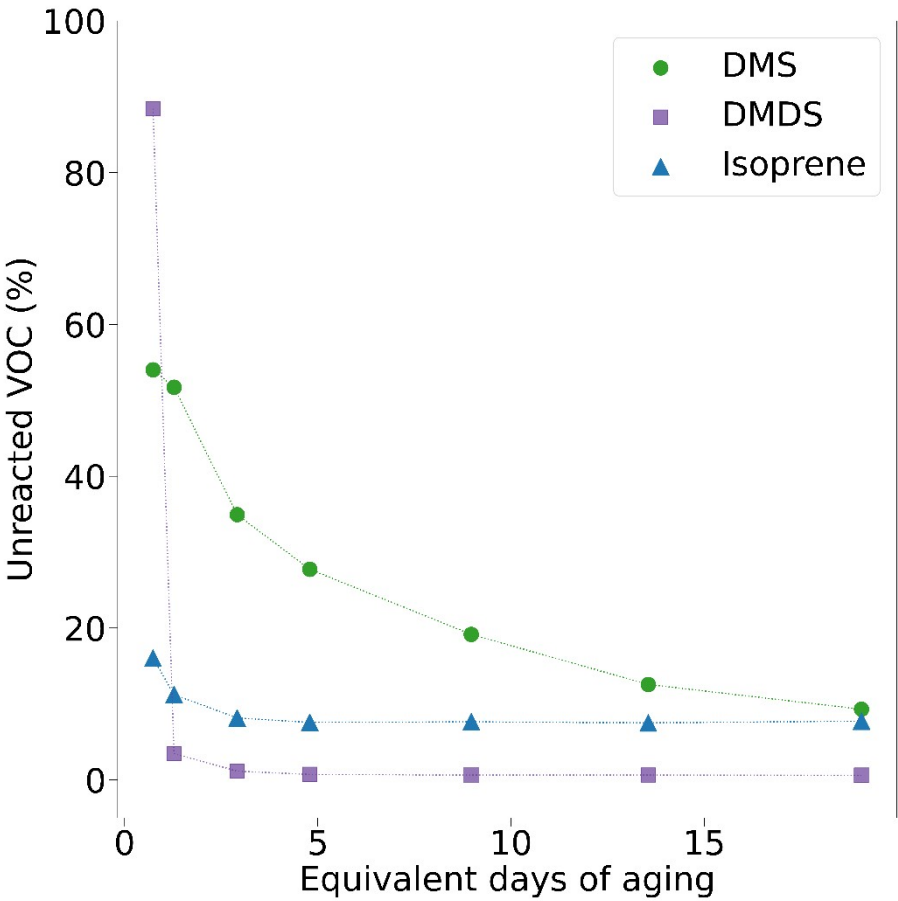

37

38

39

40

41

42

43

44

45

46

47

48

49

50 Figure S4: Non-reacted gas (in %) for mixture yield experiments (left: DMS and isoprene, right:  
51 DMDS and isoprene).

52

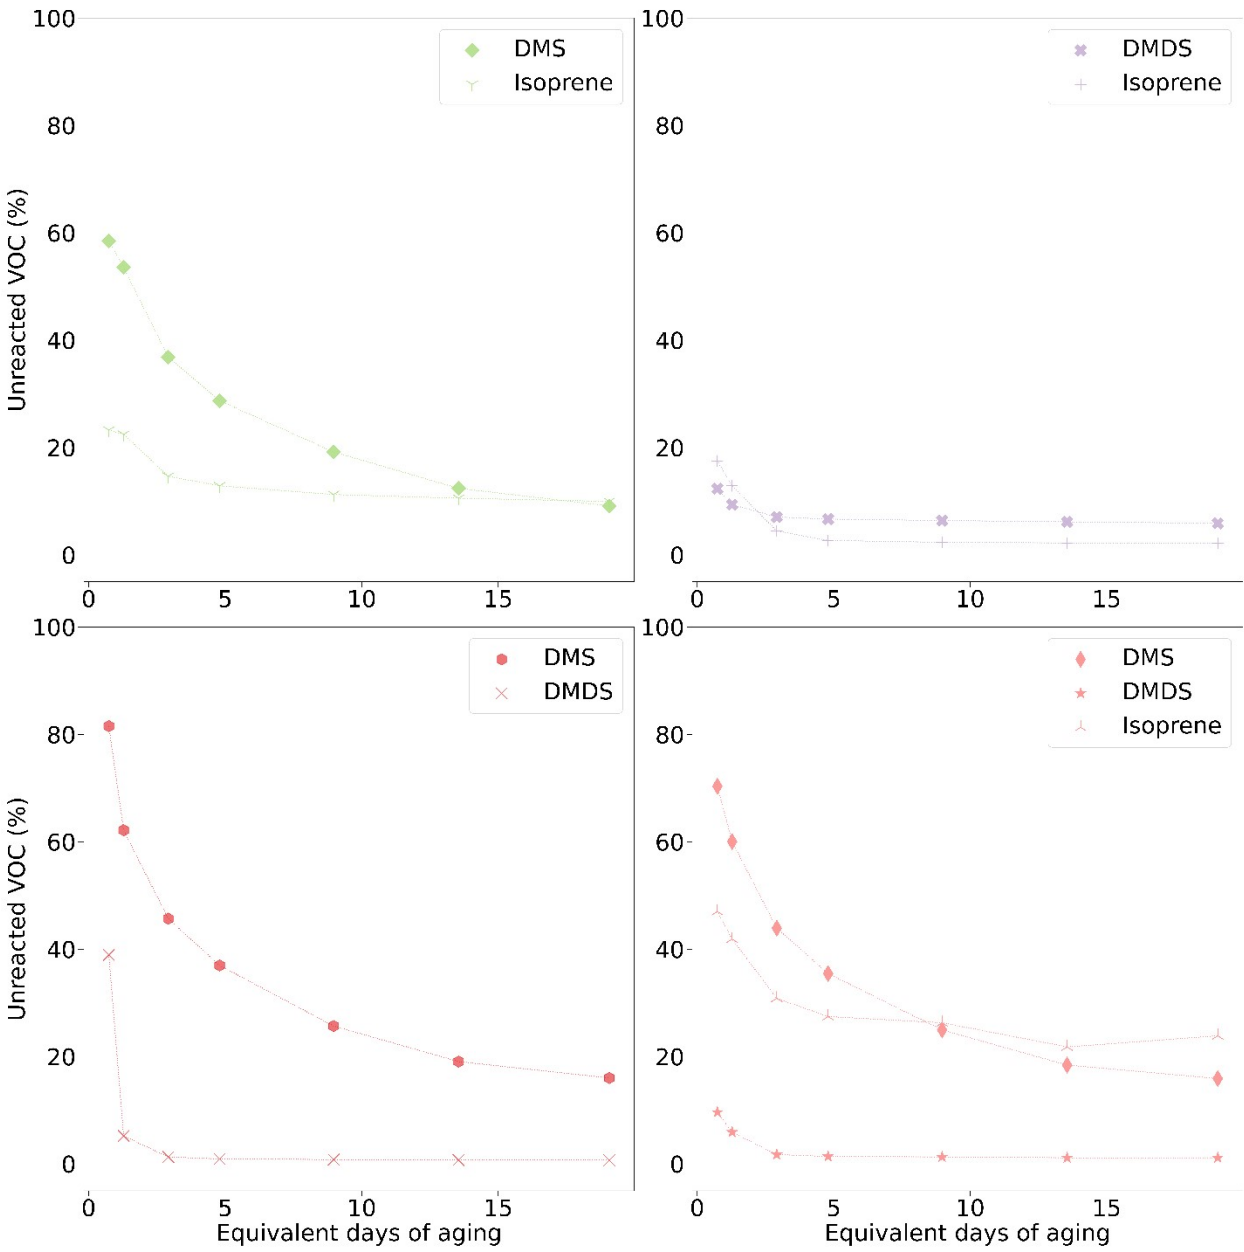

53

54

55

56

57

58 Figure S5: Aerosol yields vs. aerosol mass increase for individual VOCs and mixtures. A. Pure  
59 compounds. B. Mixtures. Dashed lines correspond to the fitting of the absorptive partitioning  
60 model from Odum et al. (1996). Error bars represent the standard deviation of three trials.

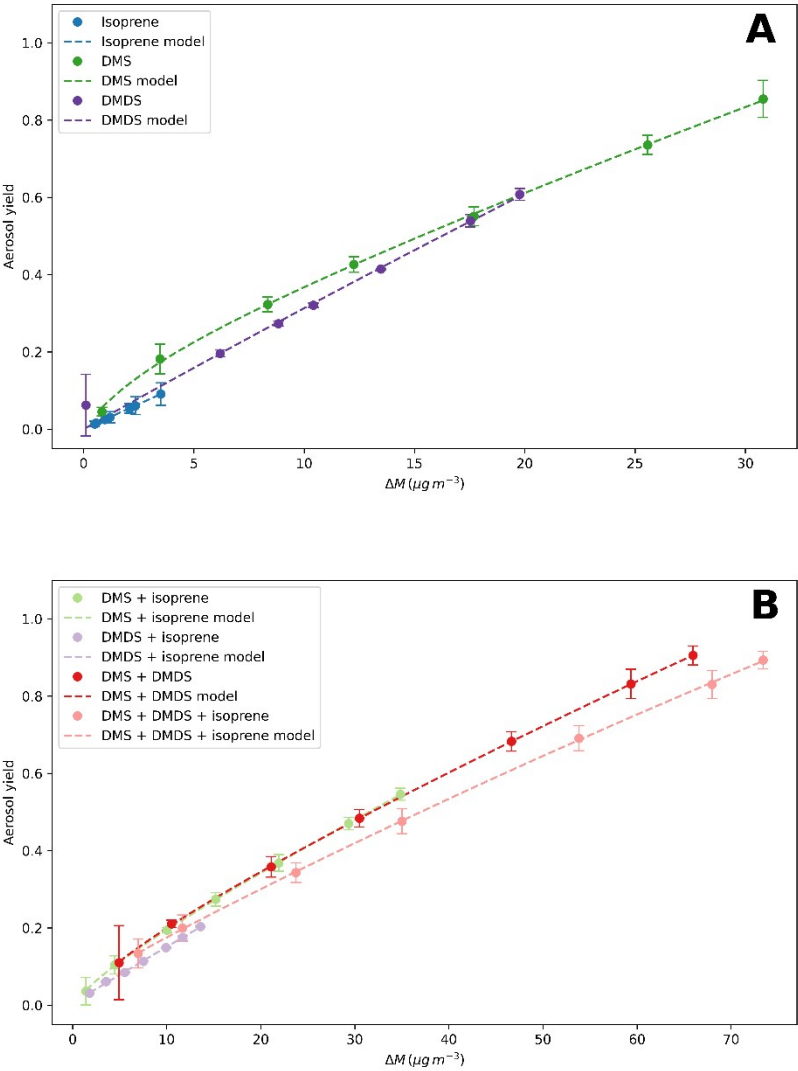

66 Figure S6: MSA and sulfate aerosol concentrations molar fractions for DMS, DMDS, and mixtures  
67 with isoprene. Error bars represent the standard deviation of four trials.

68

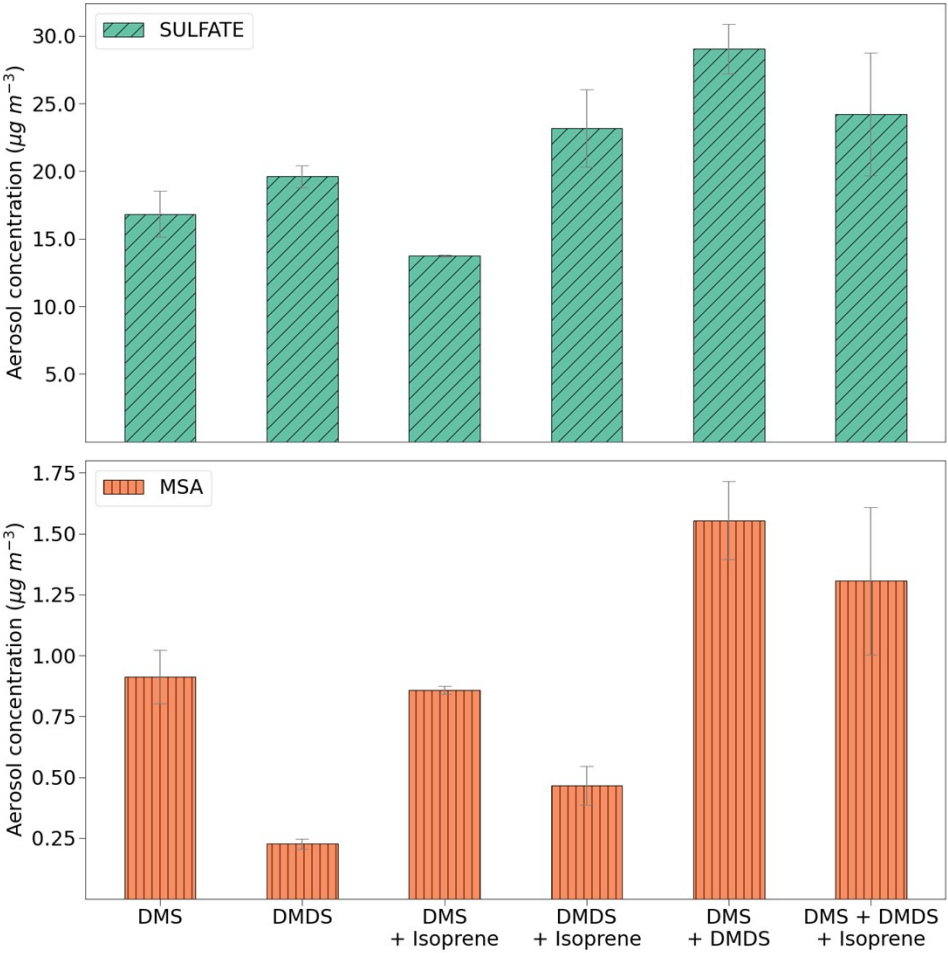

69

70

71

72 Figure S7: Sulfate molar fraction for DMS, DMDS, DMS/isoprene and DMDS/isoprene  
 73 experiments. P-values under 0.01 and 0.05 are shown for a paired t-test (two tails). Error bars  
 74 represent the standard deviation of four trials.

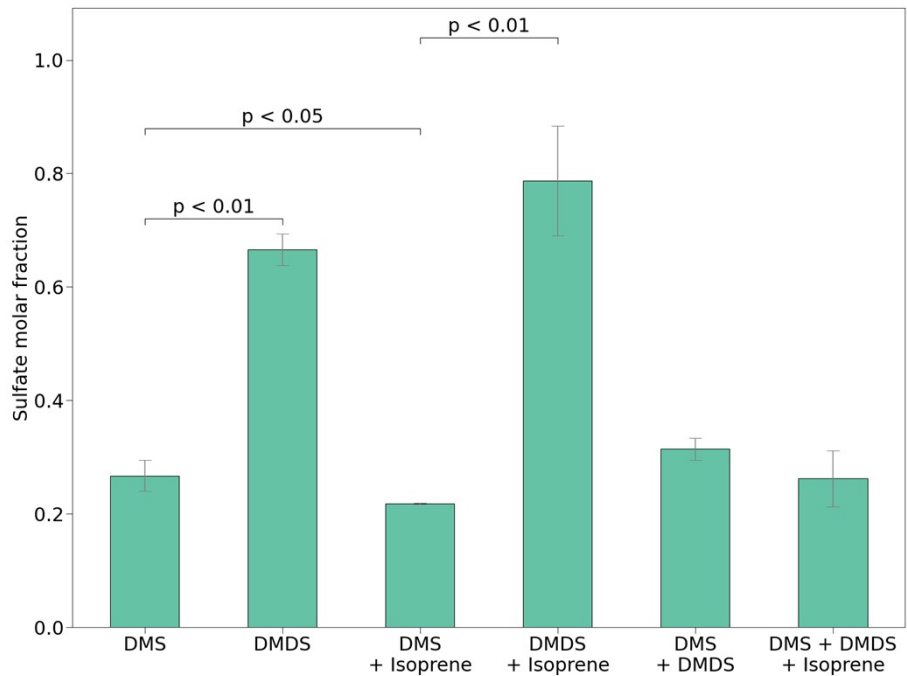

75  
 76 Figure S8: MSA molar fraction for DMS, DMDS, DMS/isoprene and DMDS/isoprene  
 77 experiments. P-values under 0.01 are shown for a paired t-test (two tails). Error bars represent the  
 78 standard deviation of four trials.

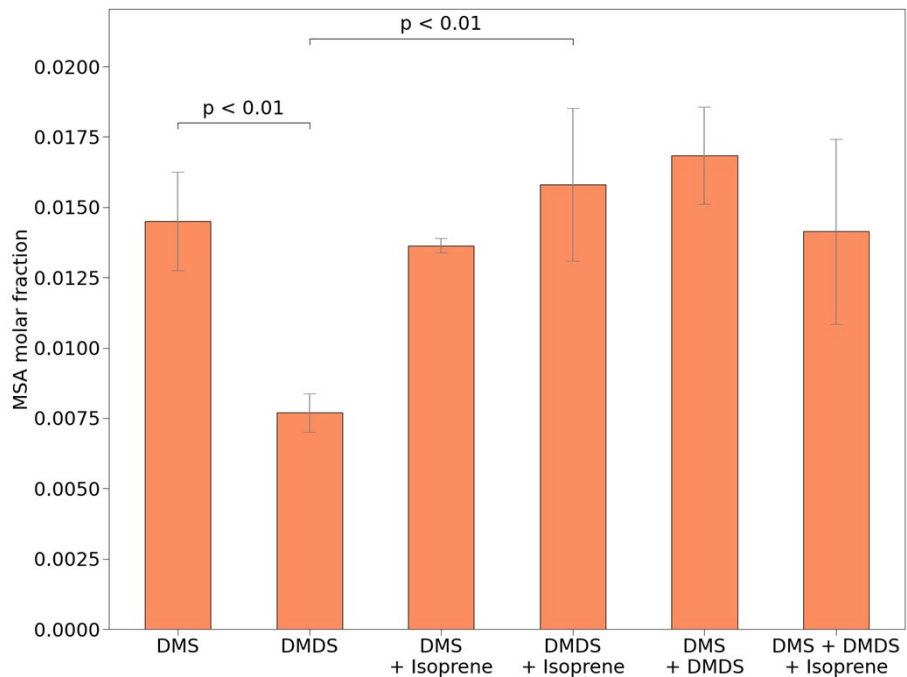

Figure S9: Average mass spectra of 60 nm particles produced by various VOCs and mixtures after they have been coated with matrix TMGN (red lines). Black lines represent the average spectra of homogeneously nucleated TMGN particles.

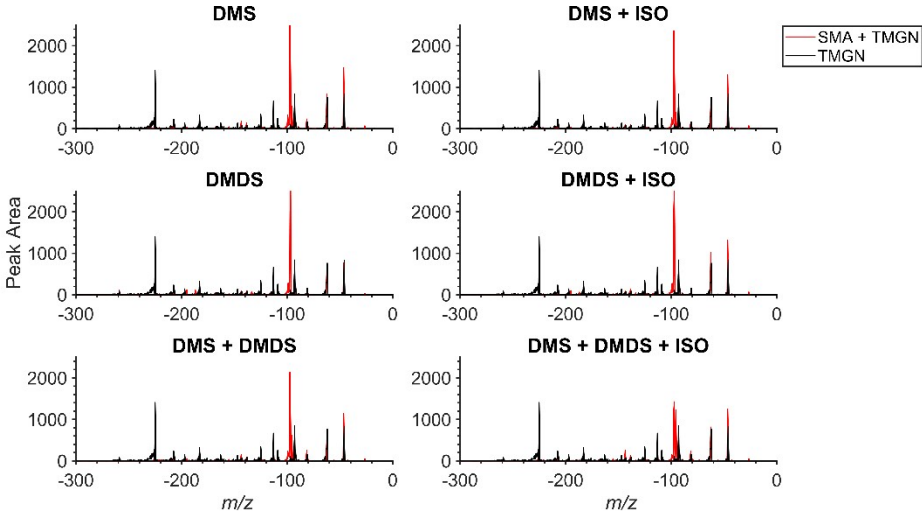

87 Figure S10: Average mass spectra of 20 nm particles produced by various VOCs and mixtures  
 88 after they have been coated with matrix TMGN (red lines). Black lines represent the average  
 89 spectra of homogeneously nucleated TMGN particles.

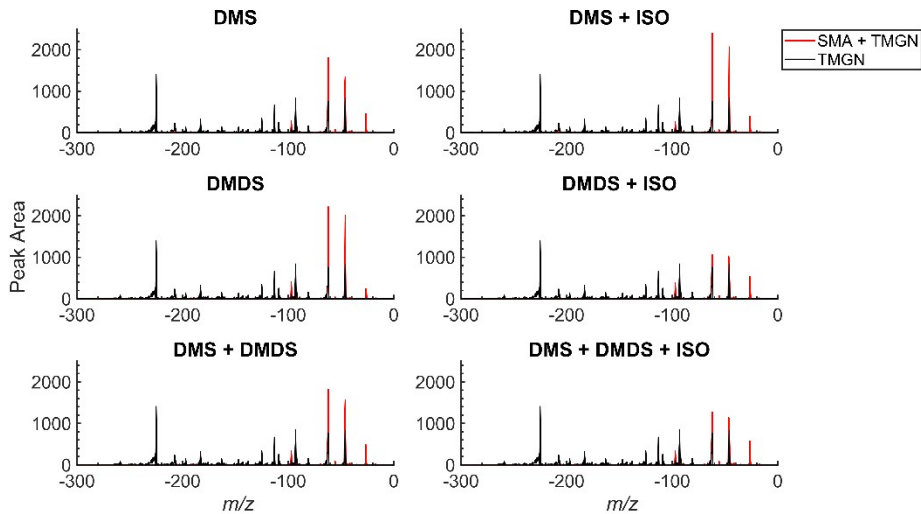

90  
 91

92 Figure S11: Fraction of 20 nm particles produced by the different VOCs and mixtures that contain  
 93 MSA and sulfate. Colors represent the fraction of particles that present peak areas falling in  
 94 specific ranges.

95

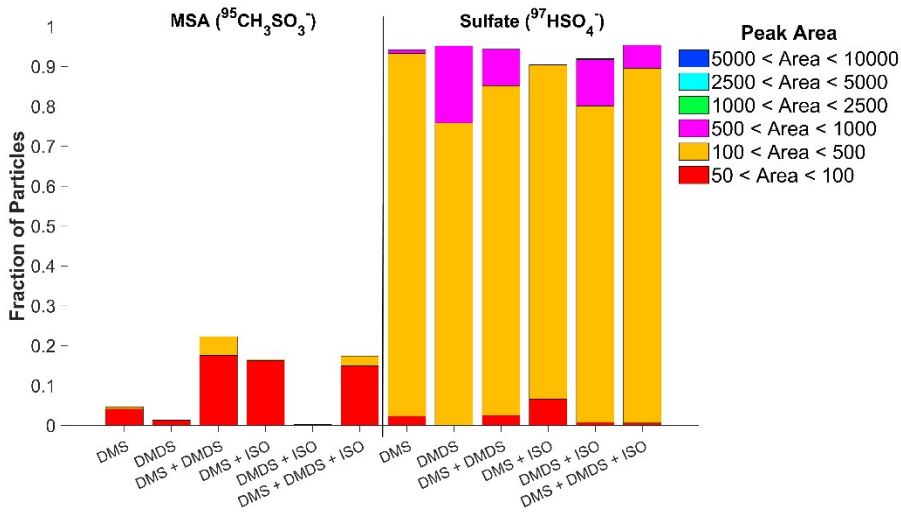

96  
 97  
 98

99 Figure S12: Positive and negative mode Orbitrap spectra from the mixture of DMS, DMDS, and  
 100 Isoprene. Sulfate, MSA, and dimethyl sulfoxide (DMSO) have been identified.

101

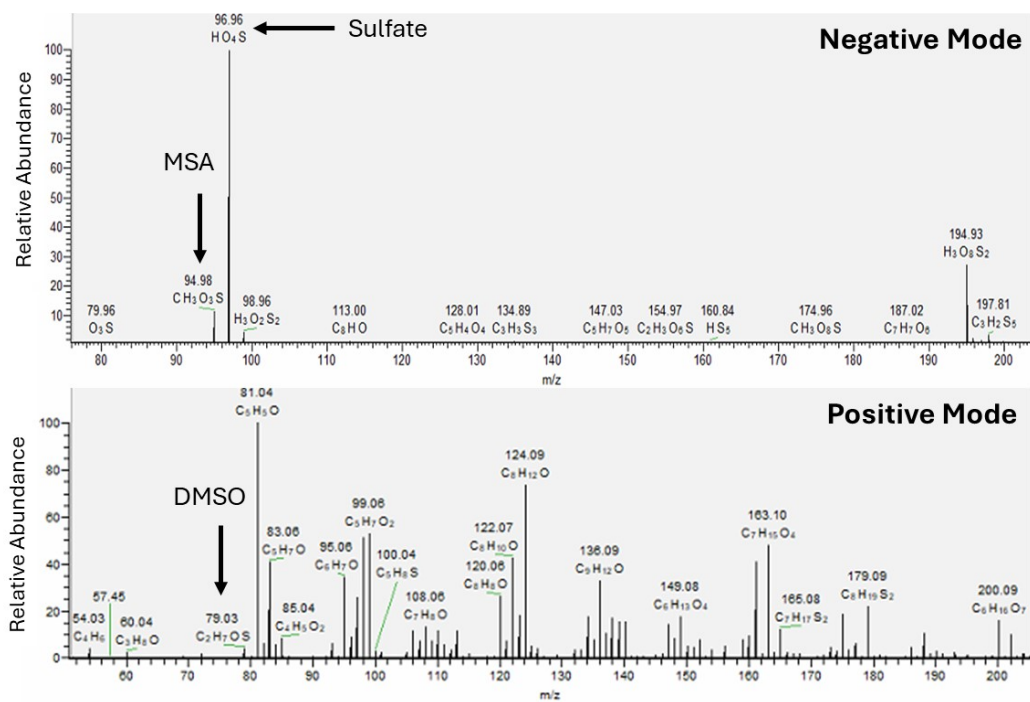

102

103

104

105

106
